# Supplementary material for: Effect of Facial Skin Temperature on the Perception of Anxiety: A Pilot Study
Source: PubMed Central journal article supplement (PMC7551020; doi:10.3390/healthcare8030206), 2020-07-09
Supplement: healthcare-08-00206-s001.pdf [file healthcare-08-00206-s001.pdf]

**Table S1.** Mean scores between groups for the CPR quality parameters and knowledge, stress and anxiety questionnaires.

| CPR Parameters/<br>STAI Scores                                     | Study<br>Moment     | Udergraduate<br>(BS) | <i>p</i> Value<br>(Pre-<br>/Post-<br>test | Postgraduate (MS) | <i>p</i> Value<br>(Pre-<br>/Post-<br>test | <i>p</i> Value       |
|--------------------------------------------------------------------|---------------------|----------------------|-------------------------------------------|-------------------|-------------------------------------------|----------------------|
|                                                                    |                     | Score Mean (SD)      |                                           | Score Mean (SD)   |                                           |                      |
| Knowledge<br>questionnaire<br>(%)                                  | Success<br>Rate (%) | 70.83 (19.50)        |                                           | 82.24 (10.47)     |                                           | 0.026 <sup>*,a</sup> |
|                                                                    | Correct<br>answers  | 5.67 (1.56)          |                                           | 6.58(.84)         |                                           | 0.037 <sup>*,b</sup> |
| CPR global score<br>(%)                                            |                     | 68.24 (17.78)        |                                           | 80.74 (16.33)     |                                           | 0.027 <sup>*,b</sup> |
| Number of<br>compressions                                          |                     | 163.81 (15.98)       |                                           | 156.11 (17.88)    |                                           | 0.198 <sup>c</sup>   |
| Compressions<br>proper depth (%)                                   |                     | 90.81 (23.09)        |                                           | 98.53 (3.86)      |                                           | 0.290 <sup>c</sup>   |
| Compressions<br>proper<br>expansion (%)                            |                     | 77.52 (32)           |                                           | 74.05 (30.98)     |                                           | 0.430 <sup>c</sup>   |
| Compressions<br>rate adequate<br>(%)                               |                     | 47.10 (38.73)        |                                           | 53.26 (38.57)     |                                           | 0.559 <sup>c</sup>   |
| Mean<br>Compressions<br>rate 1 minute                              |                     | 122.48 (11.64)       |                                           | 110.84 (23.32)    |                                           | 0.002 <sup>*,c</sup> |
| Time spent<br>without<br>compressions<br>interruption<br>(seconds) |                     | 68.81 (3.61)         |                                           | 72.42 (4.51)      |                                           | 0.008 <sup>*,a</sup> |
| Ventilations<br>global score (%)                                   |                     | 31.43 (39.83)        |                                           | 55.42 (42.76)     |                                           | 0.085 <sup>c</sup>   |
| Number of<br>ventilations                                          |                     | 3.38 (4.48)          |                                           | 5.63 (4.39)       |                                           | 0.209 <sup>c</sup>   |
| Ventilations<br>adequate<br>volume (%)                             |                     | 43.86 (49.391)       |                                           | 59.74 (46.21)     |                                           | 0.324 <sup>c</sup>   |
| Ventilations<br>excessive<br>volume (%)                            |                     | 3.76 (15.303)        |                                           | 8.74±20.83        |                                           | 0.295 <sup>c</sup>   |
| Stress visual<br>analogue scale<br>score (VAS)                     | Pre-test            | 3.24 (1.97)          | 0.874 <sup>d</sup>                        | 2.74 (1.82)       | 0.635 <sup>d</sup>                        | 0.287 <sup>c</sup>   |
|                                                                    | Post-test           | 3.40 (2.26)          |                                           | 3.03 (2.59)       |                                           | 0.502 <sup>c</sup>   |
| State-Trait<br>anxiety<br>inventory score<br>(STAI)                | Pre-test            | 24.24 (4.74)         | 0.752 <sup>d</sup>                        | 22.68 (5.07)      | 0.084 <sup>d</sup>                        | 0.323 <sup>a</sup>   |
|                                                                    | Post-test           | 23.90 (4.812)        |                                           | 24.95 (5.20)      |                                           | 0.514 <sup>a</sup>   |

\*  $p < 0.05$ ; \*\*  $p < 0.01$ ; <sup>a</sup> t-Student independent samples; <sup>b</sup> Chi-Squared Pearson; <sup>c</sup> Mann–Whitney U; <sup>d</sup> t-Student paired samples.

**Table S2.** Bivariate correlations between STAI scores and temperature values of the selected regions of interest before and after simulation.

| Facial Region | Point               | Group                   | Statistic and <i>p</i> Value Title | STAI Pre-Test | STAI Post-Test |
|---------------|---------------------|-------------------------|------------------------------------|---------------|----------------|
| Nose          | Average             | Undergraduate (BS)      | Correlation coefficient            | -0.184        | -0.262         |
|               |                     |                         | Significance                       | 0.426         | 0.251          |
|               |                     | Postgraduate (MS)       | Correlation coefficient            | 0.379         | -0.080         |
|               |                     |                         | Significance                       | 0.109         | 0.744          |
| Forehead      | Maximum             | Undergraduate (BS)      | Correlation coefficient            | 0.627 **      | 0.537 *        |
|               |                     |                         | Significance                       | 0.002         | 0.012          |
|               |                     | Postgraduate (MS)       | Correlation coefficient            | 0.499 *       | -0.051         |
|               |                     |                         | Significance                       | 0.030         | 0.835          |
|               | Average             | Undergraduate (BNS)     | Correlation coefficient            | 0.331         | 0.553 *        |
|               |                     |                         | Significance                       | 0.143         | 0.009          |
|               |                     | Postgraduate (MS)       | Correlation coefficient            | 0.440         | 0.068          |
|               |                     |                         | Significance                       | 0.060         | 0.782          |
| Minimum       | Undergraduate (BS)  | Correlation coefficient | -0.157                             | 0.305         |                |
|               |                     | Significance            | 0.495                              | 0.179         |                |
|               | Postgraduate (MS)   | Correlation coefficient | 0.086                              | 0.141         |                |
|               |                     | Significance            | 0.727                              | 0.566         |                |
| Periorbital   | Maximum             | Undergraduate (BS)      | Correlation coefficient            | 0.324         | 0.323          |
|               |                     |                         | Significance                       | 0.152         | 0.153          |
|               |                     | Postgraduate (MS)       | Correlation coefficient            | 0.473 *       | 0.092          |
|               |                     |                         | Significance                       | 0.042         | 0.708          |
|               | Average             | Undergraduate (BNS)     | Correlation coefficient            | 0.145         | 0.391          |
|               |                     |                         | Significance                       | 0.529         | 0.080          |
|               |                     | Postgraduate (MS)       | Correlation coefficient            | 0.509 *       | -0.059         |
|               |                     |                         | Significance                       | 0.026         | 0.812          |
| Minimum       | Undergraduate (BNS) | Correlation coefficient | -0.178                             | -0.132        |                |
|               |                     | Significance            | 0.440                              | 0.568         |                |
|               | Postgraduate (MS)   | Correlation coefficient | 0.332                              | -0.249        |                |
|               |                     | Significance            | 0.166                              | 0.304         |                |
| Maxillary     | Maximum             | Undergraduate (BS)      | Correlation coefficient            | 0.120         | 0.035          |
|               |                     |                         | Significance                       | 0.604         | 0.880          |
|               |                     | Postgraduate (MS)       | Correlation coefficient            | 0.537 *       | 0.029          |

|                       |         |                                               |         |          |
|-----------------------|---------|-----------------------------------------------|---------|----------|
|                       |         | Significance                                  | 0.018   | 0.906    |
|                       | Average | Undergraduate (BS)<br>Correlation coefficient | 0.133   | 0.020    |
|                       |         | Significance                                  | 0.566   | 0.932    |
|                       |         | Postgraduate (MS)<br>Correlation coefficient  | 0.534 * | 0.049    |
|                       |         | Significance                                  | 0.019   | 0.843    |
|                       | Minimum | Undergraduate (BS)<br>Correlation coefficient | 0.013   | -0.139   |
|                       |         | Significance                                  | 0.957   | 0.546    |
|                       |         | Postgraduate (MS)<br>Correlation coefficient  | 0.388   | 0.057    |
|                       |         | Significance                                  | 0.101   | 0.816    |
|                       | Maximum | Undergraduate (BN)<br>Correlation coefficient | 0.381   | 0.332    |
|                       |         | Significance                                  | 0.089   | 0.142    |
|                       |         | Postgraduate (MS)<br>Correlation coefficient  | 0.115   | -0.135   |
|                       |         | Significance                                  | 0.640   | 0.581    |
| Neck /<br>Upper chest | Average | Undergraduate (BS)<br>Correlation coefficient | 0.381   | 0.559 ** |
|                       |         | Significance                                  | 0.089   | 0.008    |
|                       |         | Postgraduate (MS)<br>Correlation coefficient  | 0.142   | 0.120    |
|                       |         | Significance                                  | 0.563   | 0.624    |
|                       | Minimum | Undergraduate (BS)<br>Correlation coefficient | 0.104   | -0.036   |
|                       |         | Significance                                  | 0.652   | 0.877    |
|                       |         | Postgraduate (MS)<br>Correlation coefficient  | 0.230   | 0.269    |
|                       |         | Significance                                  | 0.344   | 0.265    |

\*  $p < 0.05$ ; \*\*  $p < 0.01$ ; Pearson correlation coefficients.

**Table S3.** Bivariate correlations between CPR quality parameters and temperature values of the selected regions of interest for the Undergraduate (BS) Group.

| Temperature Difference | Statistic and <i>p</i> Value | CPR Global Score <sup>a</sup> | Number of Compressions <sup>b</sup> | Compressions Proper Depth <sup>b</sup> | Compressions Proper Expansion <sup>b</sup> | Compressions Rate Adequate <sup>b</sup> | Mean Compressions Rate <sup>b</sup> | Time without Interruption <sup>a</sup> | Ventilations Global Score <sup>b</sup> | Number of Ventilations <sup>b</sup> | Ventilations Adequate Volume <sup>b</sup> | Ventilations Excessive Volume <sup>b</sup> |
|------------------------|------------------------------|-------------------------------|-------------------------------------|----------------------------------------|--------------------------------------------|-----------------------------------------|-------------------------------------|----------------------------------------|----------------------------------------|-------------------------------------|-------------------------------------------|--------------------------------------------|
| Nose                   | Correlation coefficient      | 0.292                         | 0.280                               | 0.223                                  | -0.396                                     | -0.207                                  | 0.307                               | -0.054                                 | 0.121                                  | 0.188                               | 0.056                                     | 0.285                                      |
|                        | Significance                 | 0.199                         | 0.218                               | 0.332                                  | 0.075                                      | 0.367                                   | 0.175                               | 0.816                                  | 0.602                                  | 0.416                               | 0.811                                     | 0.211                                      |
| Forehead maximum       | Correlation coefficient      | 0.377                         | -0.373                              | 0.027                                  | 0.239                                      | 0.295                                   | -0.264                              | -0.199                                 | 0.198                                  | 0.242                               | 0.355                                     | -0.057                                     |
|                        | Significance                 | 0.092                         | 0.096                               | 0.908                                  | 0.296                                      | 0.193                                   | 0.247                               | 0.388                                  | 0.390                                  | 0.291                               | 0.115                                     | 0.805                                      |
| Forehead average       | Correlation coefficient      | 0.379                         | -0.406                              | 0.083                                  | 0.238                                      | 0.327                                   | -0.310                              | -0.111                                 | 0.081                                  | 0.115                               | 0.311                                     | -0.204                                     |
|                        | Significance                 | 0.090                         | 0.068                               | 0.721                                  | 0.299                                      | 0.148                                   | 0.171                               | 0.633                                  | 0.728                                  | 0.619                               | 0.170                                     | 0.375                                      |
| Forehead minimum       | Correlation coefficient      | 0.108                         | -0.322                              | -0.111                                 | -0.073                                     | 0.445 *                                 | -0.395                              | -0.170                                 | 0.175                                  | 0.247                               | 0.159                                     | 0.329                                      |
|                        | Significance                 | 0.643                         | 0.155                               | 0.632                                  | 0.752                                      | 0.043                                   | 0.076                               | 0.463                                  | 0.447                                  | 0.280                               | 0.492                                     | 0.146                                      |
| Periorbital maximum    | Correlation coefficient      | 0.272                         | -0.514 *                            | -0.238                                 | 0.215                                      | 0.331                                   | -0.407                              | -0.304                                 | 0.344                                  | 0.377                               | 0.379                                     | 0.166                                      |
|                        | Significance                 | 0.232                         | 0.017                               | 0.298                                  | 0.350                                      | 0.153                                   | 0.067                               | 0.181                                  | 0.127                                  | 0.092                               | 0.090                                     | 0.472                                      |
| Periorbital average    | Correlation coefficient      | 0.268                         | -0.360                              | 0.178                                  | 0.009                                      | 0.332                                   | -0.324                              | -0.160                                 | 0.124                                  | 0.179                               | 0.216                                     | 0.060                                      |
|                        | Significance                 | 0.241                         | 0.109                               | 0.440                                  | 0.971                                      | 0.141                                   | 0.152                               | 0.489                                  | 0.591                                  | 0.437                               | 0.348                                     | 0.796                                      |
| Periorbital minimum    | Correlation coefficient      | 0.420                         | 0.015                               | 0.097                                  | -0.014                                     | 0.024                                   | -0.063                              | 0.062                                  | 0.201                                  | 0.274                               | 0.263                                     | 0.222                                      |
|                        | Significance                 | 0.058                         | 0.948                               | 0.675                                  | 0.950                                      | 0.917                                   | 0.787                               | 0.788                                  | 0.383                                  | 0.229                               | 0.249                                     | 0.334                                      |
| Maxillary maximum      | Correlation coefficient      | 0.406                         | -0.237                              | 0.021                                  | 0.112                                      | 0.316                                   | -0.234                              | 0.027                                  | 0.138                                  | 0.201                               | 0.222                                     | 0.128                                      |
|                        | Significance                 | 0.067                         | 0.300                               | 0.928                                  | 0.630                                      | 0.164                                   | 0.307                               | 0.909                                  | 0.552                                  | 0.382                               | 0.333                                     | 0.581                                      |
| Maxillary average      | Correlation coefficient      | 0.393                         | -0.059                              | 0.124                                  | -0.013                                     | 0.145                                   | -0.065                              | -0.018                                 | 0.066                                  | 0.117                               | 0.155                                     | 0.042                                      |
|                        | Significance                 | 0.078                         | 0.801                               | 0.592                                  | 0.955                                      | 0.531                                   | 0.778                               | 0.939                                  | 0.776                                  | 0.613                               | 0.503                                     | 0.856                                      |
| Maxillary minimum      | Correlation coefficient      | 0.351                         | 0.435 *                             | 0.263                                  | -0.328                                     | -0.277                                  | 0.300                               | 0.215                                  | 0.069                                  | 0.128                               | 0.033                                     | 0.279                                      |
|                        | Significance                 | 0.119                         | 0.049                               | 0.249                                  | 0.146                                      | 0.223                                   | 0.186                               | 0.350                                  | 0.767                                  | 0.580                               | 0.886                                     | 0.220                                      |
| Neck maximum           | Correlation coefficient      | 0.432                         | -0.313                              | -0.004                                 | 0.182                                      | 0.342                                   | -0.221                              | -0.399                                 | -0.012                                 | 0.017                               | 0.044                                     | -0.111                                     |
|                        | Significance                 | 0.050                         | 0.167                               | 0.988                                  | 0.429                                      | 0.130                                   | 0.336                               | 0.073                                  | 0.959                                  | 0.943                               | 0.850                                     | 0.632                                      |
| Neck average           | Correlation coefficient      | 0.401                         | -0.212                              | 0.170                                  | 0.124                                      | 0.354                                   | -0.228                              | -0.227                                 | 0.164                                  | 0.234                               | 0.179                                     | 0.101                                      |
|                        | Significance                 | 0.072                         | 0.356                               | 0.461                                  | 0.592                                      | 0.115                                   | 0.321                               | 0.322                                  | 0.477                                  | 0.308                               | 0.437                                     | 0.664                                      |
| Neck minimum           | Correlation coefficient      | 0.091                         | 0.012                               | 0.111                                  | -0.287                                     | 0.147                                   | -0.146                              | 0.025                                  | 0.196                                  | 0.193                               | 0.059                                     | 0.199                                      |

Significance 0.694 0.959 0.633 0.207 0.524 0.529 0.915 0.395 0.401 0.799 0.388

<sup>a</sup> Pearson's R correlation coefficient; <sup>b</sup> Spearman's Rho correlation coefficient; \*  $p < 0.05$

**Table S4.** Bivariate correlations between CPR quality parameters and temperature values of the selected regions of interest for the Postgraduate (MS) Group.

| Temperature Difference | Statistic and p Value   | CPR Global Score <sup>a</sup> | Number of Compressions <sup>b</sup> | Compressions Proper Depth <sup>b</sup> | Compressions Proper Expansion <sup>b</sup> | Compressions Rate Adequate <sup>b</sup> | Mean Compressions Rate <sup>b</sup> | Time without Compressions <sup>a</sup> | Ventilations Global Score <sup>b</sup> | Number of Ventilations <sup>b</sup> | Ventilations Adequate Volume <sup>b</sup> | Ventilations Excessive Volume <sup>b</sup> |
|------------------------|-------------------------|-------------------------------|-------------------------------------|----------------------------------------|--------------------------------------------|-----------------------------------------|-------------------------------------|----------------------------------------|----------------------------------------|-------------------------------------|-------------------------------------------|--------------------------------------------|
| Nose                   | Correlation coefficient | 0.203                         | -0.524 *                            | 0.469 *                                | -0.027                                     | -0.088                                  | -0.278                              | -0.075                                 | 0.294                                  | 0.126                               | -0.029                                    | 0.247                                      |
|                        | Significance            | 0.405                         | 0.021                               | 0.043                                  | 0.913                                      | 0.720                                   | 0.249                               | 0.761                                  | 0.222                                  | 0.606                               | 0.907                                     | 0.309                                      |
| Forehead maximum       | Correlation coefficient | 0.105                         | -0.341                              | 0.233                                  | -0.067                                     | -0.210                                  | -0.331                              | 0.125                                  | 0.257                                  | -0.021                              | 0.052                                     | -0.136                                     |
|                        | Significance            | 0.668                         | 0.153                               | 0.336                                  | 0.786                                      | 0.388                                   | 0.167                               | 0.609                                  | 0.289                                  | 0.933                               | 0.833                                     | 0.578                                      |
| Forehead average       | Correlation coefficient | 0.145                         | -0.310                              | 0.094                                  | 0.037                                      | -0.041                                  | -0.180                              | 0.011                                  | 0.446                                  | 0.122                               | 0.096                                     | -0.129                                     |
|                        | Significance            | 0.553                         | 0.196                               | 0.703                                  | 0.880                                      | 0.866                                   | 0.460                               | 0.965                                  | 0.055                                  | 0.618                               | 0.697                                     | 0.597                                      |
| Forehead minimum       | Correlation coefficient | -0.083                        | 0.0069                              | 0.292                                  | 0.394                                      | -0.384                                  | -0.109                              | 0.183                                  | -0.050                                 | -0.072                              | -0.089                                    | -0.327                                     |
|                        | Significance            | 0.736                         | 0.780                               | 0.225                                  | 0.095                                      | 0.104                                   | 0.657                               | 0.454                                  | 0.839                                  | 0.770                               | 0.718                                     | 0.172                                      |
| Periorbital maximum    | Correlation coefficient | 0.019                         | -0.248                              | 0.219                                  | -0.052                                     | -0.132                                  | -0.299                              | 0.279                                  | 0.204                                  | 0.068                               | -0.055                                    | 0.005                                      |
|                        | Significance            | 0.939                         | 0.305                               | 0.367                                  | 0.831                                      | 0.591                                   | 0.213                               | 0.248                                  | 0.402                                  | 0.784                               | 0.824                                     | 0.984                                      |
| Periorbital average    | Correlation coefficient | 0.159                         | -0.291                              | 0.252                                  | 0.052                                      | -0.022                                  | -0.233                              | 0.085                                  | 0.431                                  | 0.248                               | 0.088                                     | 0.156                                      |
|                        | Significance            | 0.516                         | 0.226                               | 0.298                                  | 0.834                                      | 0.930                                   | 0.338                               | 0.730                                  | 0.065                                  | 0.305                               | 0.719                                     | 0.522                                      |
| Periorbital minimum    | Correlation coefficient | 0.132                         | -0.182                              | 0.129                                  | -0.329                                     | 0.100                                   | 0.126                               | -0.284                                 | 0.301                                  | 0.188                               | 0.010                                     | 0.274                                      |
|                        | Significance            | 0.589                         | 0.455                               | 0.599                                  | 0.170                                      | 0.682                                   | 0.608                               | 0.238                                  | 0.210                                  | 0.442                               | 0.966                                     | 0.257                                      |
| Maxillary maximum      | Correlation coefficient | 0.031                         | -0.282                              | -0.078                                 | 0.050                                      | 0.179                                   | -0.270                              | 0.103                                  | 0.325                                  | 0.131                               | 0.069                                     | 0.010                                      |
|                        | Significance            | 0.898                         | 0.241                               | 0.752                                  | 0.839                                      | 0.463                                   | 0.264                               | 0.675                                  | 0.174                                  | 0.594                               | 0.780                                     | 0.968                                      |
| Maxillary average      | Correlation coefficient | 0.025                         | -0.367                              | 0.162                                  | -0.100                                     | 0.026                                   | -0.281                              | 0.052                                  | 0.178                                  | 0.033                               | 0.003                                     | 0.036                                      |
|                        | Significance            | 0.918                         | 0.123                               | 0.507                                  | 0.683                                      | 0.917                                   | 0.243                               | 0.833                                  | 0.467                                  | 0.892                               | 0.991                                     | 0.885                                      |
| Maxillary minimum      | Correlation coefficient | -0.001                        | -0.677 **                           | 0.111                                  | -0.179                                     | 0.038                                   | -0.423                              | -0.173                                 | -0.052                                 | -0.145                              | -0.232                                    | 0.277                                      |
|                        | Significance            | 0.997                         | 0.001                               | 0.650                                  | 0.464                                      | 0.878                                   | 0.071                               | 0.480                                  | 0.833                                  | 0.553                               | 0.340                                     | 0.251                                      |
| Neck maximum           | Correlation coefficient | -0.009                        | 0.137                               | 0.101                                  | -0.248                                     | -0.242                                  | 0.054                               | 0.217                                  | -0.027                                 | 0.307                               | -0.118                                    | 0.400                                      |
|                        | Significance            | 0.972                         | 0.577                               | 0.680                                  | 0.305                                      | 0.319                                   | 0.826                               | 0.371                                  | 0.912                                  | 0.201                               | 0.631                                     | 0.090                                      |
| Neck average           | Correlation coefficient | 0.065                         | -0.146                              | 0.186                                  | -0.180                                     | -0.244                                  | -0.075                              | 0.048                                  | 0.062                                  | 0.261                               | -0.075                                    | 0.423                                      |
|                        | Significance            | 0.793                         | 0.551                               | 0.445                                  | 0.460                                      | 0.314                                   | 0.761                               | 0.845                                  | 0.800                                  | 0.281                               | 0.759                                     | 0.071                                      |

|                         |                            |        |       |        |        |       |          |        |        |        |        |        |
|-------------------------|----------------------------|--------|-------|--------|--------|-------|----------|--------|--------|--------|--------|--------|
| <b>Neck<br/>minimum</b> | Correlation<br>coefficient | -0.322 | 0.324 | -0.052 | -0.399 | 0.022 | -0.537 * | -0.183 | -0.265 | -0.343 | -0.042 | -0.453 |
|                         | Significance               | 0.178  | 0.176 | 0.832  | 0.090  | 0.929 | 0.018    | 0.452  | 0.273  | 0.150  | 0.863  | 0.052  |

<sup>a</sup> Pearson's R correlation coefficient; <sup>b</sup> Spearman's Rho correlation coefficient; \*  $p < 0.05$ ; \*\*  $p < 0.01$ .
